# Supplementary material for: Detection of nucleic acids via G-quadruplex-controlled l-cysteine oxidation and catalyzed hairpin assembly-assisted signal amplification
Source: Royal Society of Chemistry journal article supplement (doi:10.1039/c8ra08296k), 2018-01-01
Supplement: c8ra08296k1.pdf [file c8ra08296k1.pdf]

## Electronic Supplementary Information

### **Detection of nucleic acids via G-quadruplex-controlled L-cysteine oxidation and catalyzed hairpin assembly- assisted signal amplification**

Piaopiao Chen,<sup>a</sup> Pingyue Hu,<sup>b</sup> Ke Huang,<sup>b</sup> Erica Sawyer,<sup>a</sup> Ke Sun,<sup>a</sup> Binwu  
Ying,<sup>a</sup> Xiawei Wei,<sup>a</sup> Jia Geng<sup>\*a</sup>

<sup>a</sup> Department of Laboratory Medicine, State Key Laboratory of Biotherapy,  
West China Hospital, Sichuan University and Collaborative Innovation Center  
for Biotherapy, Chengdu, Sichuan, 610041, China

<sup>b</sup> College of Chemistry and Material Science, Sichuan Normal University,  
Chengdu, Sichuan, 610068, China

\*Corresponding author. E-mail: geng.jia@scu.edu.cn

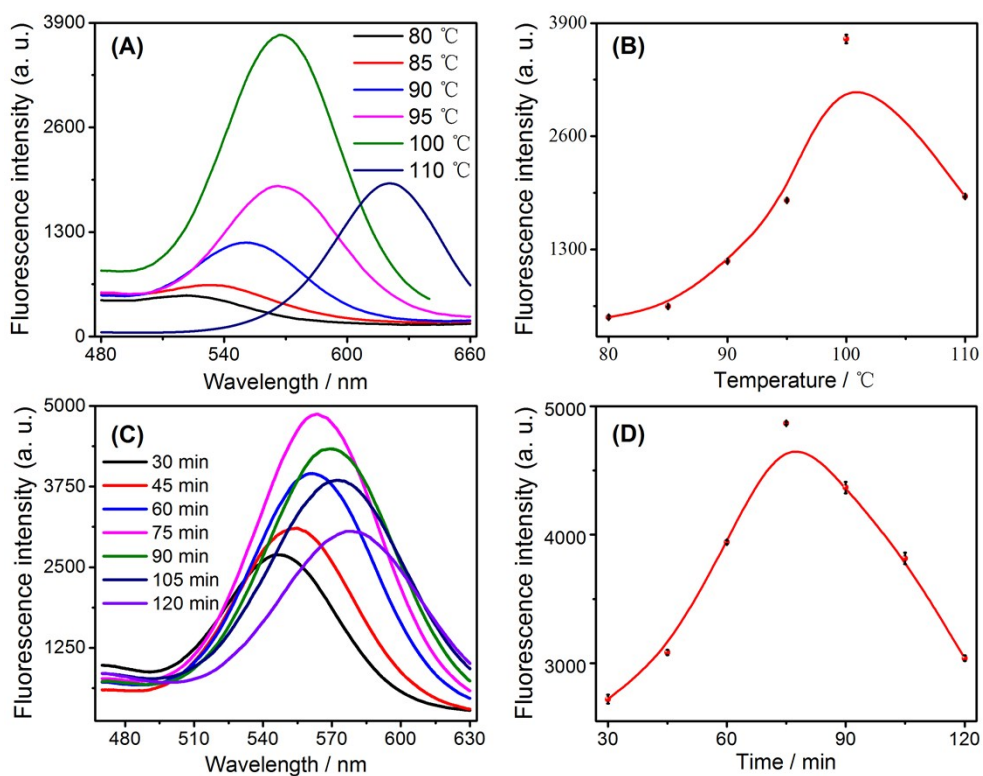

**Fig. S1** Optimization of  $L$ -cysteine-modulated synthesis of CdTe QDs conditions. (A) and (B): reaction temperature; (C) and (D): reaction time. Error bars were estimated from three replicate measurements.

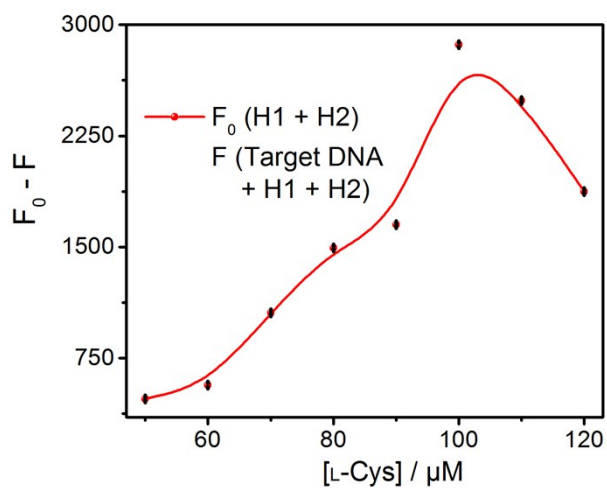

**Fig. S2** Optimization of concentration of  $L$ -cysteine ( $L$ -Cys) for CdTe QDs synthesis. Error bars were estimated from three replicate measurements.

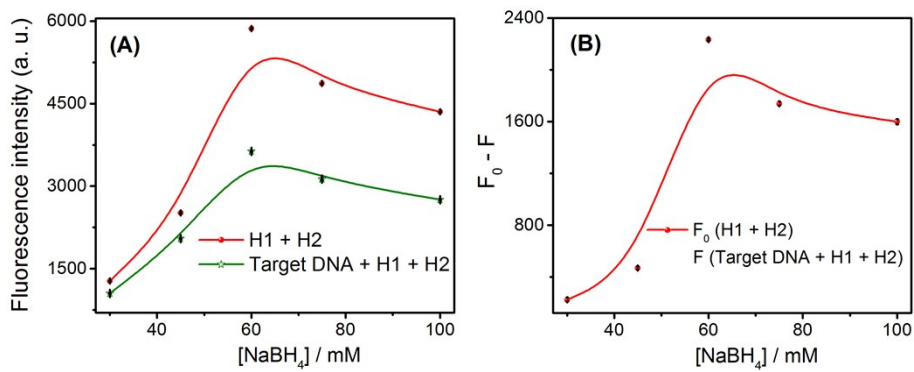

**Fig. S3** Optimization of concentration of  $\text{NaBH}_4$  for CdTe QDs synthesis. Error bars were estimated from three replicate measurements.

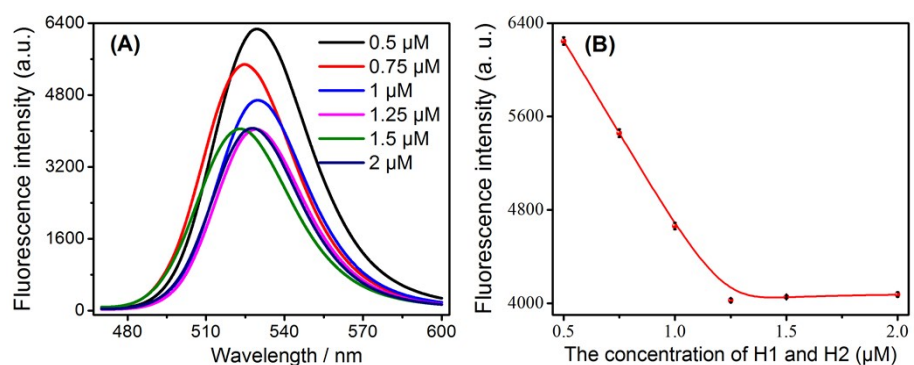

**Fig. S4** Optimization of concentration of H1 and H2 for catalyzed hairpin assembly-assisted signal amplification reaction. Error bars were estimated from three replicate measurements.

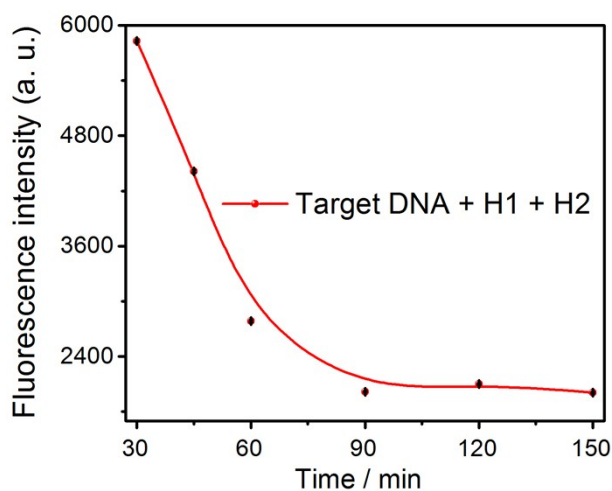

**Fig. S5** Optimization of time of catalyzed hairpin assembly-assisted signal amplification reaction. Error bars were estimated from three replicate measurements.

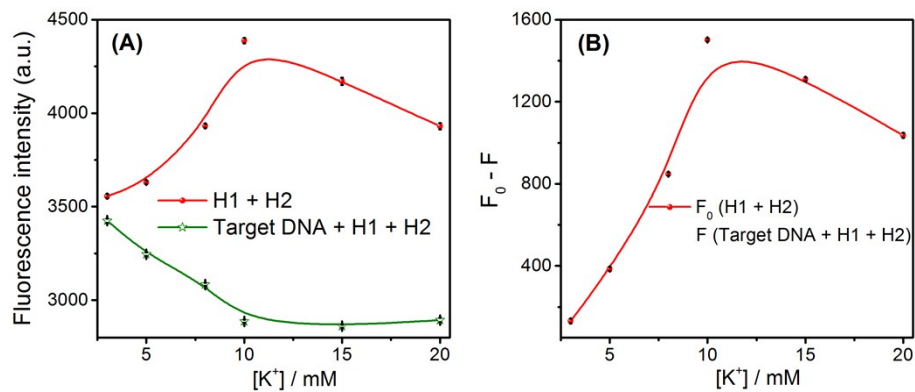

**Fig. S6** Optimization of concentration of K<sup>+</sup> for form the G-quadruplex structure. Error bars were estimated from three replicate measurements.

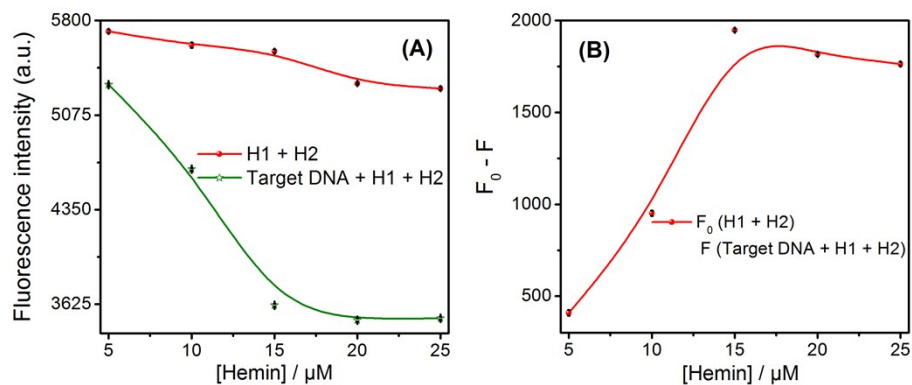

**Fig. S7** Optimization of concentration of hemin for form the G-quadruplex-hemin complex. Error bars were estimated from three replicate measurements.

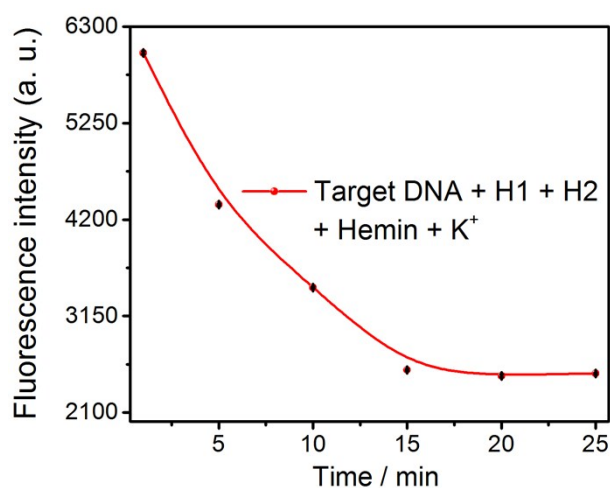

**Fig. S8** Optimization of time of form the G-quadruplex-hemin complex. Error bars were estimated from three replicate measurements.

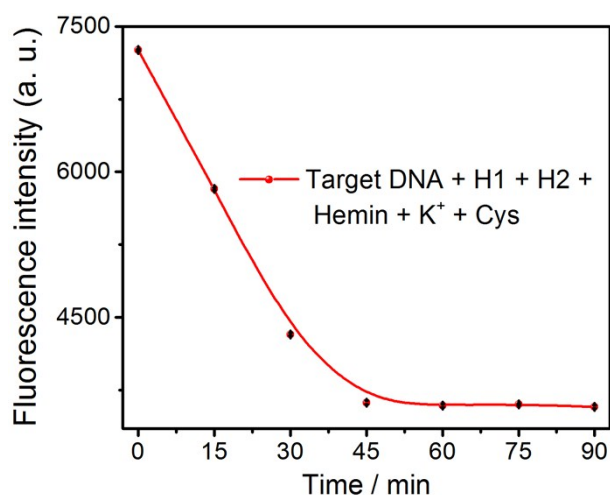

**Fig. S9** Optimization of time of oxidation L-cysteine to cystine by the G-quadruplex-hemin-K<sup>+</sup> complex. Error bars were estimated from three replicate measurements.

**Table S1** Comparison of different strategies for the detection of nucleic acids

| Method              | System                                                             | LOD; Linear range     | Reference |
|---------------------|--------------------------------------------------------------------|-----------------------|-----------|
| Fluorescence        | Molecular beacon; exonuclease and polymerase                       | 28.2 fM; 50 fM-1 nM   | 1         |
| Fluorescence        | G-quadruplex-NMM; Exonuclease III                                  | 36 pM; 0.6-3 nM       | 2         |
| Fluorescence        | G-quadruplex-NMM; DNA walker                                       | 4.1 fM; 0.02-500 pM   | 3         |
| Fluorescence        | Molecular beacons; strand displacement reaction                    | 10 pM; 10-1000 pM     | 4         |
| FRET <sup>a</sup>   | Catalyzed hairpin assembly (CHA)                                   | 33 pM; 0-4 nM         | 5         |
| Colorimetric        | G-quadruplex-ABTS; polymerase and nicking endonuclease             | 10 pM; 10 pM-200 nM   | 6         |
| EC <sup>b</sup>     | Strand displacement amplification and hybridization chain reaction | 0.16 fM; 0.2 fM-1 pM  | 7         |
| ECL <sup>c</sup>    | Restriction enzyme-powered DNA walking machine                     | 0.19 pM; 0.5 pM-10 nM | 8         |
| SERS <sup>d</sup>   | Exonuclease III                                                    | 1 fM; 1 fM-10 nM      | 9         |
| CL <sup>e</sup>     | Enzyme-free DNA walker                                             | 3.9 pM; 0.05-1 nM     | 10        |
| ICP-MS <sup>f</sup> | Rolling circle amplification; Au NPs                               | 0.1 fM; 1-20 fM       | 11        |
| ICP-MS              | Hybridization chain reaction; Cu NPs                               | 4 pM; 20-1000 pM      | 12        |
| Fluorescence        | CdTe QDs; catalyzed hairpin assembly                               | 0.12 pM; 0.1 pM-1 nM  | This work |

<sup>a</sup>Donor donor-acceptor fluorescence resonance energy transfer, <sup>b</sup>Electrochemical, <sup>c</sup>Electrochemiluminescence, <sup>d</sup>Surface-enhanced Raman spectroscopy, <sup>e</sup>Chemiluminescence,

†Inductively coupled plasma mass spectrometer.

## References

- 1 S. F. Liu, H. W. Gong, X. Y. Sun, T. Liu and L. Wang, *Chem. Commun.*, 2015, **51**, 17756-17759.
- 2 C. Q. Zhao, L. Wu, J. S. Ren and X. G. Qu, *Chem. Commun.*, 2011, **47**, 5461-5463.
- 3 W. Li, L. Wang and W. Jiang, *Chem. Commun.*, 2017, **53**, 5527-5530.
- 4 J. H. Huang, X. F. Su and Z. G. Li, *Anal. Chem.*, 2012, **84**, 5939-5943.
- 5 H. M. Fang, N. L. Xie, M. Ou, J. Huang, W. S. Li, Q. Wang, J. B. Liu, X. H. Yang and K. M. Wang, *Anal. Chem.*, 2018, **90**, 7164-7170.
- 6 Z. F. Shen, F. Li, Y. F. Jiang, C. Chen, H. Xu, C. C. Li, Z. Yang and Z. S. Wu, *Anal. Chem.*, 2018, **90**, 3335-3340.
- 7 Z. Q. Chen, Y. Liu, C. Xin, J. K. Zhao and S. F. Liu, *Biosens. Bioelectron.*, 2018, **113**, 1-8.
- 8 Y. Chen, Y. Xiang, R. Yuan and Y. Q. Chai, *Nanoscale.*, 2015, **7**, 981-986.
- 9 Y. D. Sun, P. Peng, R. Y. Guo, H. H. Wang and T. Li, *Biosens. Bioelectron.*, 2018, **104**, 32-38.
- 10 N. X. Li, J. Zheng, C. R. Li, X. X. Wang, X. H. Ji and Z. K. He, *Chem. Commun.*, 2017, **53**, 8486-8488.
- 11 Y. He, D. L. Chen, M. X. Li, L. Fang, W. J. Yang, L. J. Xu and F. F. Fu, *Biosens. Bioelectron.*, 2014, **58**, 209-213.
- 12 R. Liu, C. Q. Wang, Y. M. Xu, J. Y. Hu, D. Y. Deng and Y. Lv, *Anal. Chem.*, 2017, **89**, 13269-13274.
